# Supplementary material for: Morphological and Genome-Wide Evidence of Homoploid Hybridisation in Urospermum (Asteraceae)
Source: MDPI journal article supplement (doi:10.3390/plants11020182), 2022-01-11
Supplement: s1 [file s1]

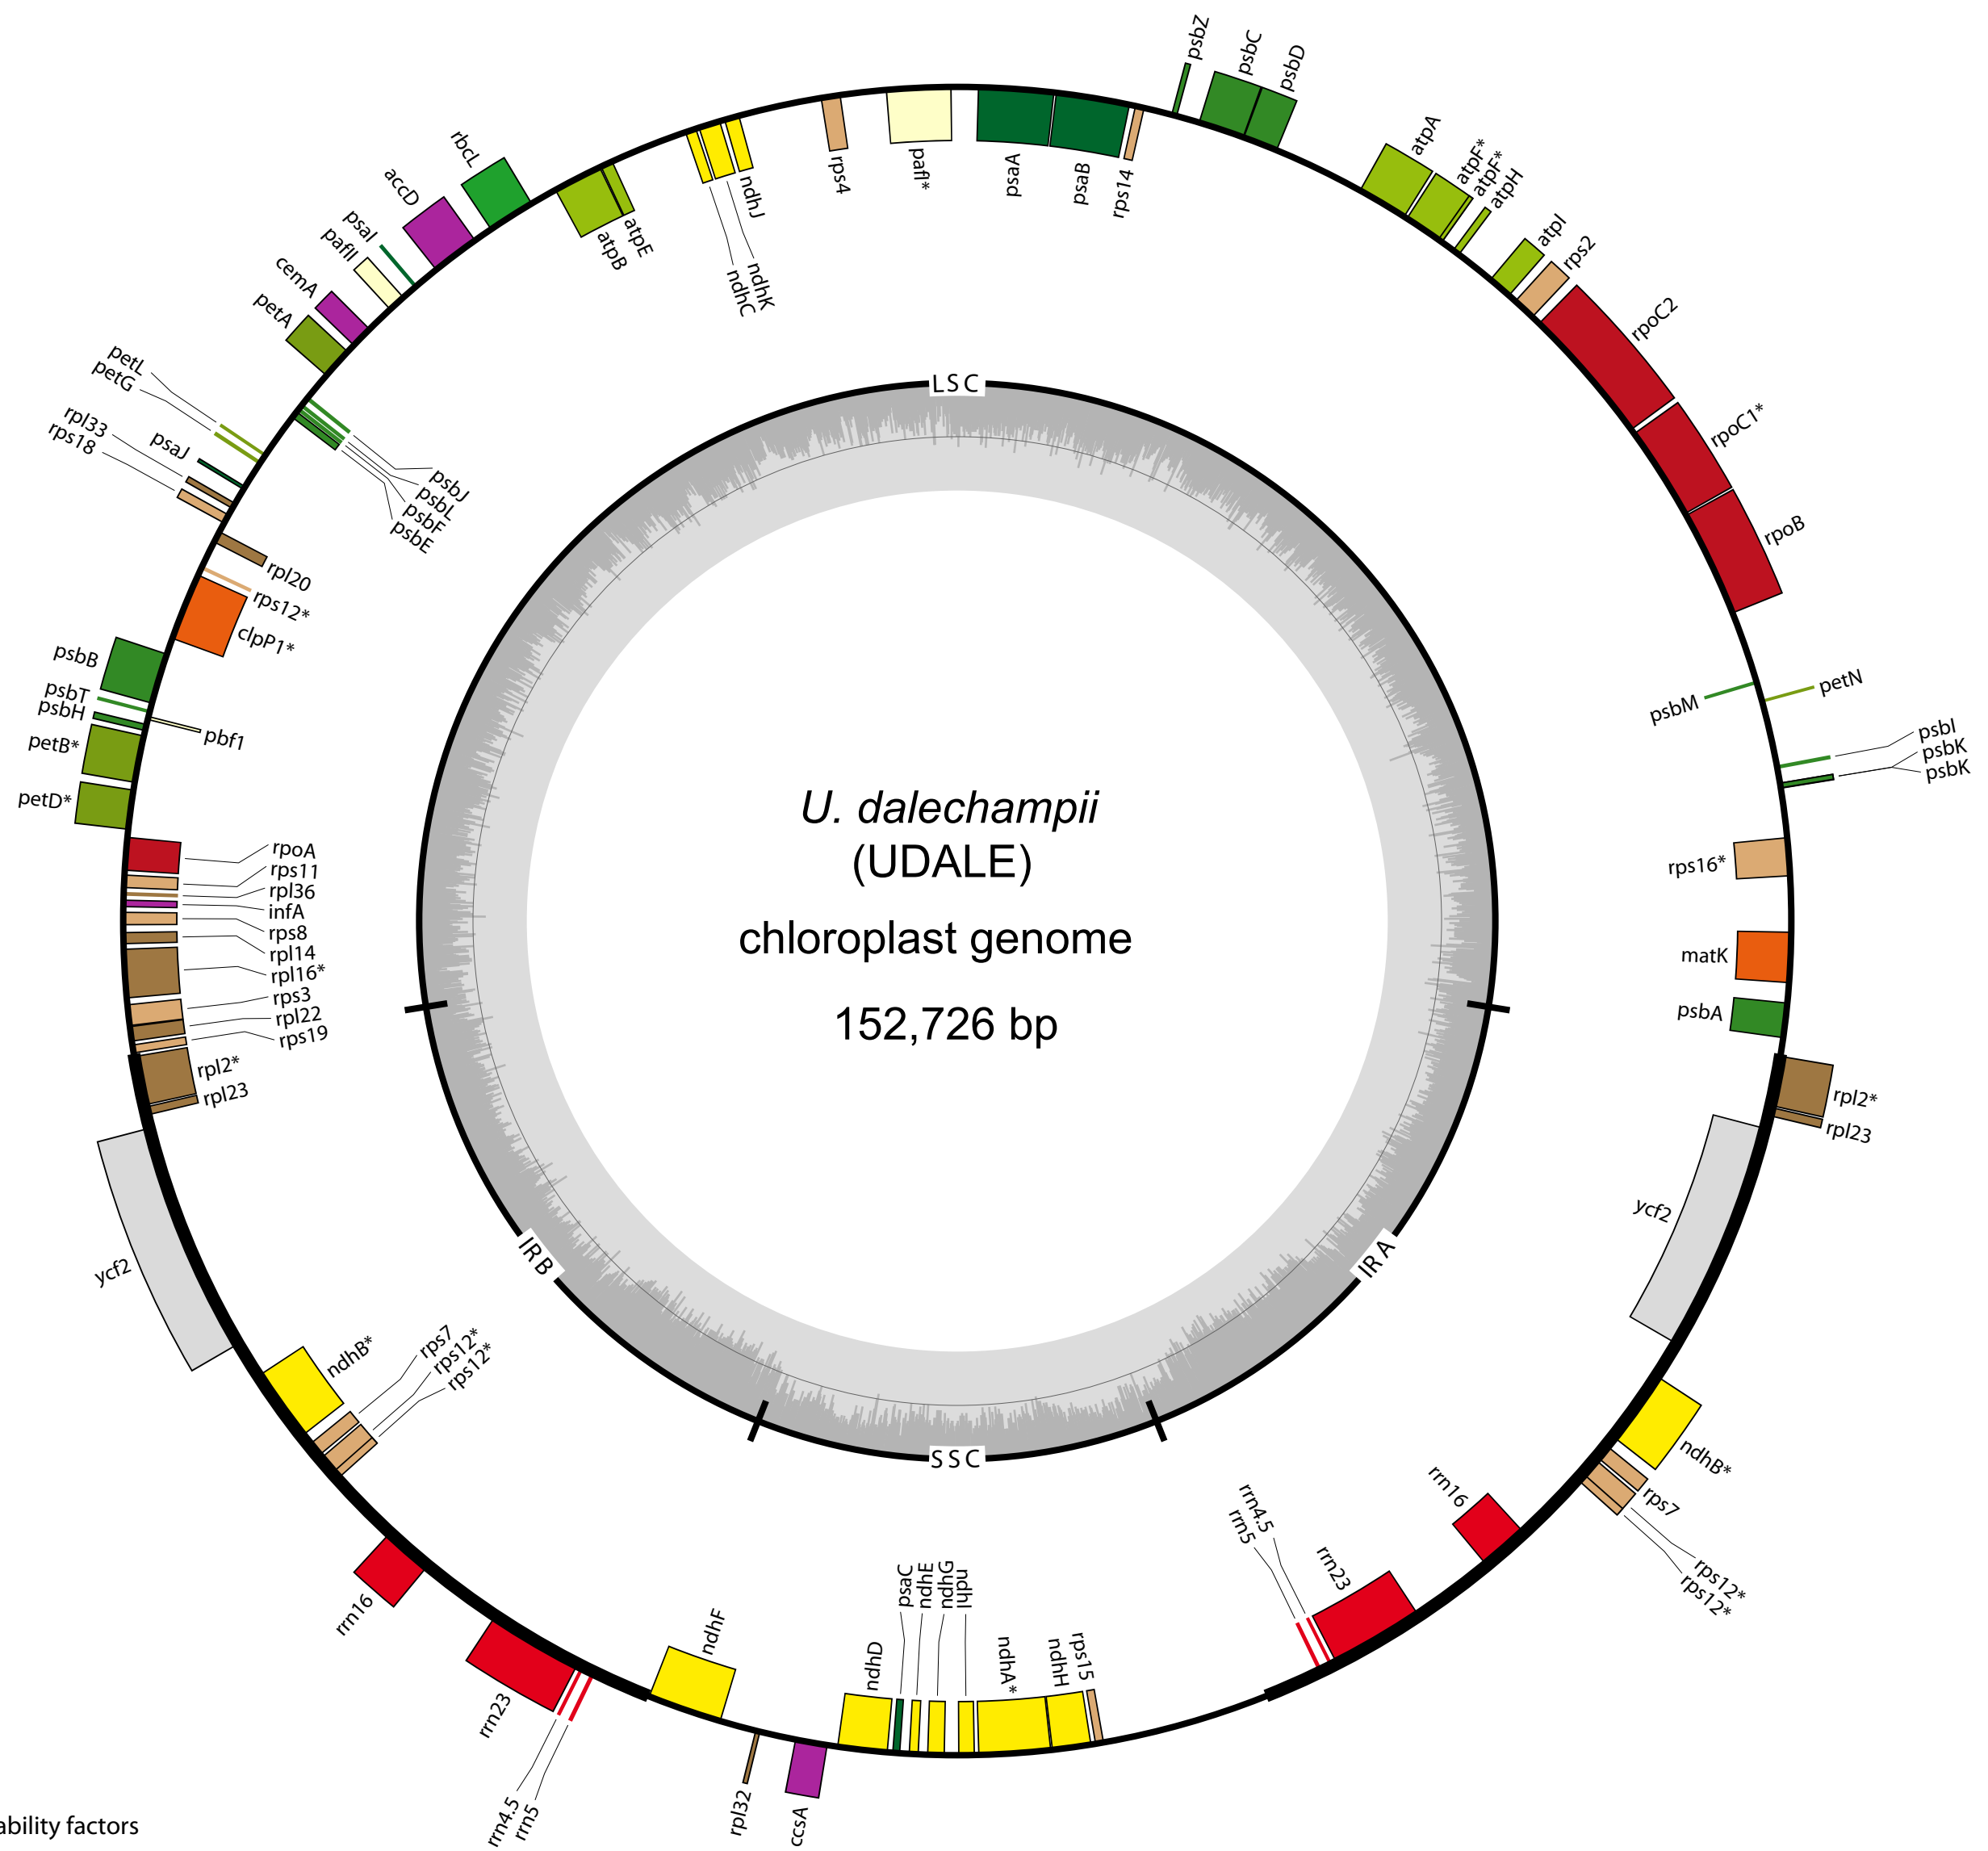

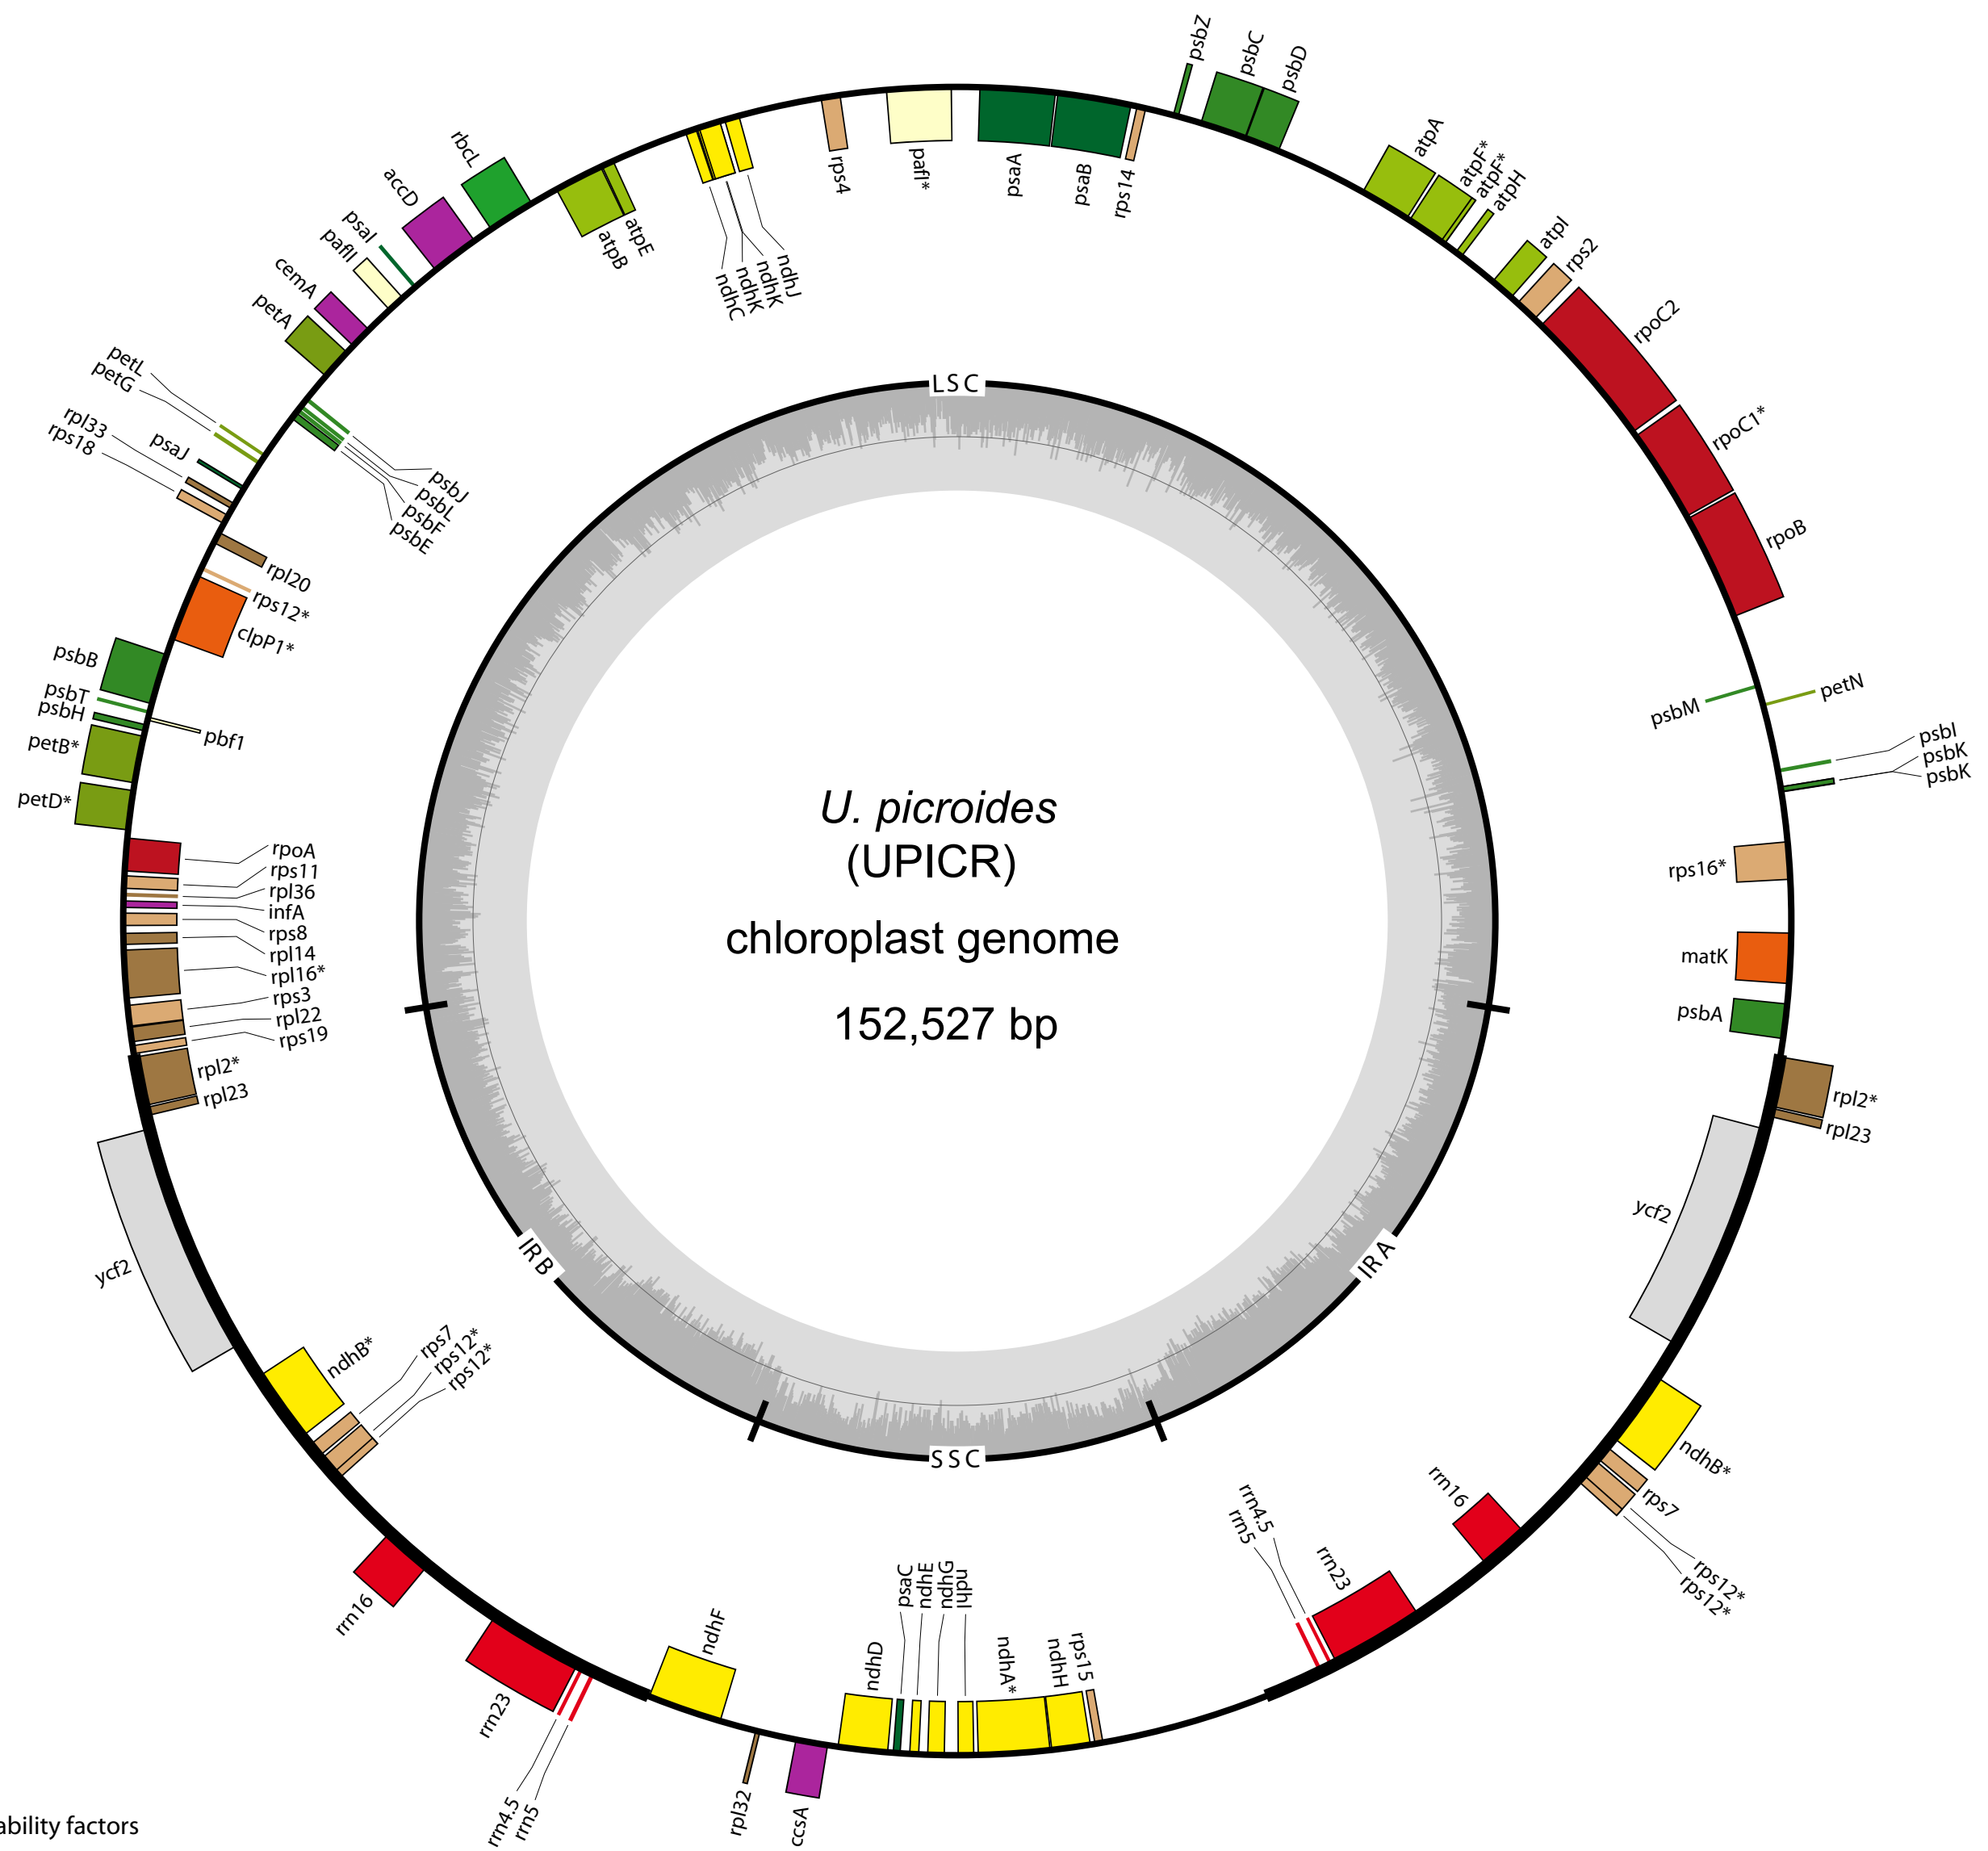

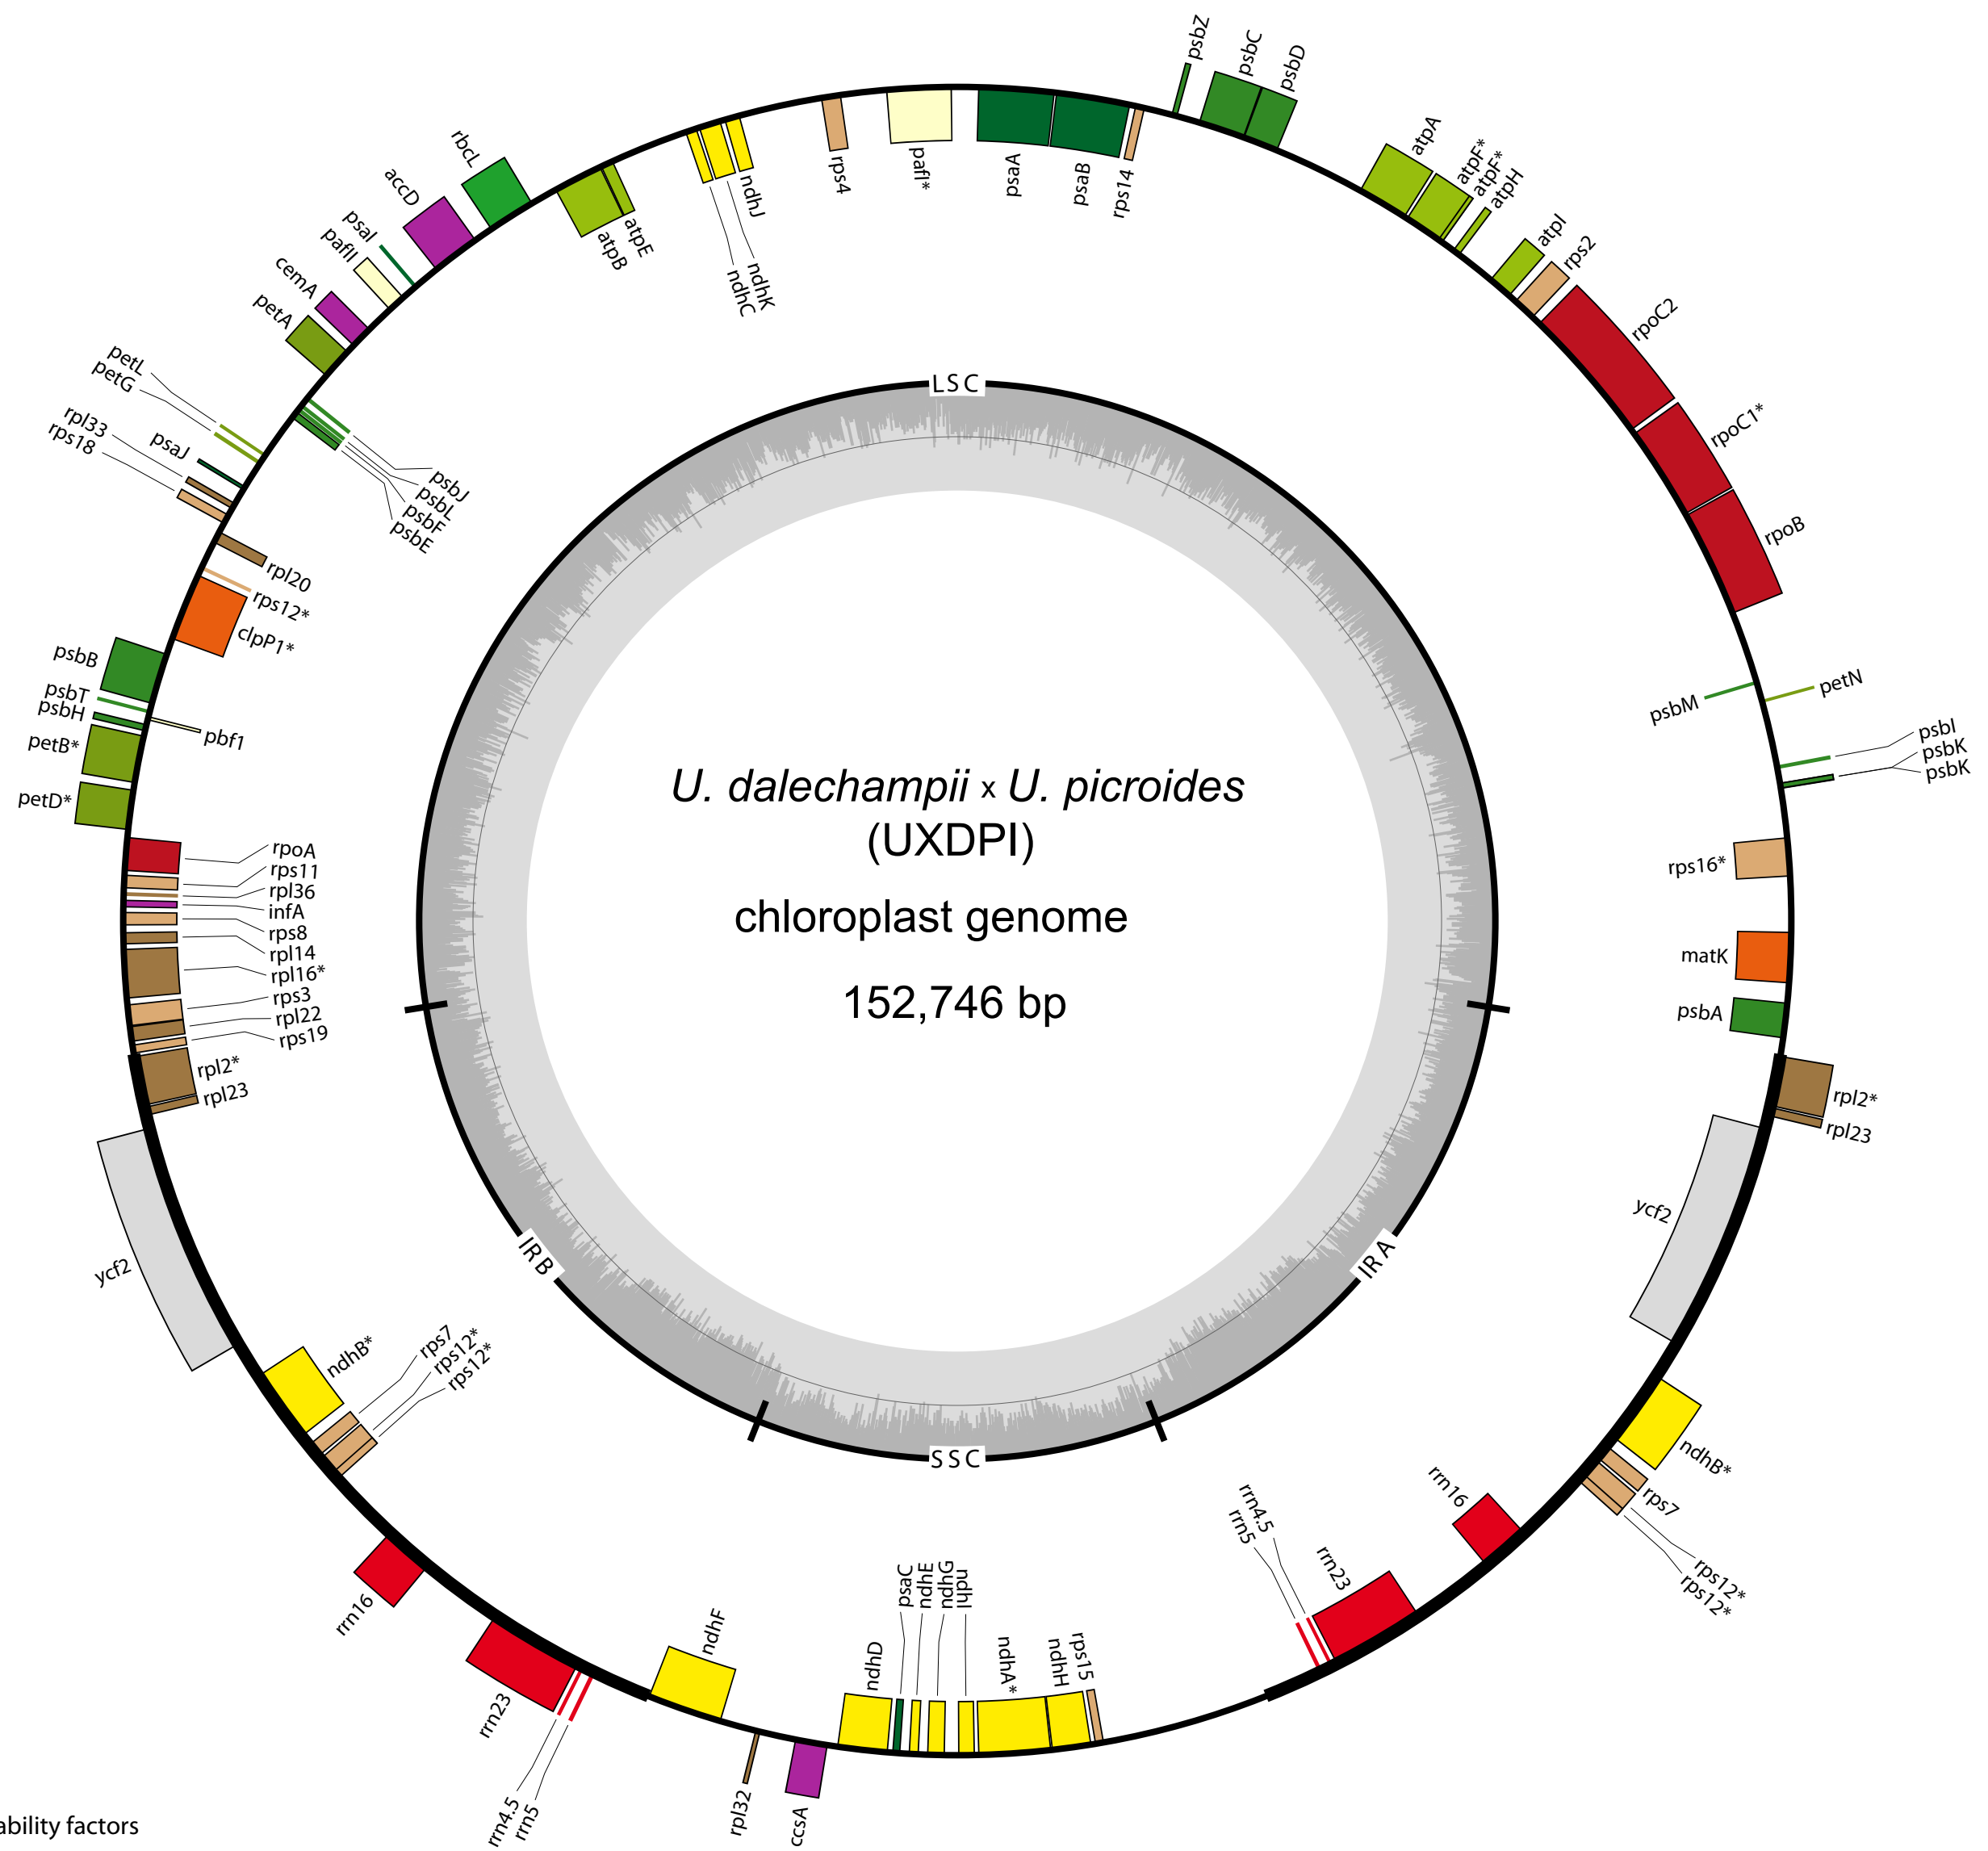

- photosystem I
- photosystem II
- cytochrome b/f complex
- ATP synthase
- NADH dehydrogenase
- RubisCO large subunit
- photosystem assembly/stability factors
- RNA polymerase
- ribosomal proteins (SSU)
- ribosomal proteins (LSU)
- transfer RNAs
- ribosomal RNAs
- clpP, matK
- other genes
- hypothetical chloroplast reading frames (ycf)
- ORFs
- origin of replication
- polycistronic transcripts
